# Supplementary material for: Inorganic Nitrate Promotes Glucose Uptake and Oxidative Catabolism in White Adipose Tissue Through the XOR-Catalyzed Nitric Oxide Pathway
Source: Oxford University Press journal article supplement (doi:10.2337/db19-0892), 2020-02-21
Supplement: db190892supplementarydata.pdf [file db190892supplementarydata.pdf]

## SUPPLEMENTARY DATA

**Supplementary Figure 1.** Immunoprecipitation blots of cell surface biotinylated Glut4 from primary mouse adipocytes treated with 500  $\mu$ M nitrate with and without 100 nM insulin showing 50 kDa molecular weight marker. C = control, I = 100 nM insulin, N = 500  $\mu$ M nitrate, N+I = 500  $\mu$ M nitrate + 100 nM insulin, M = 50 kDa molecular weight marker.

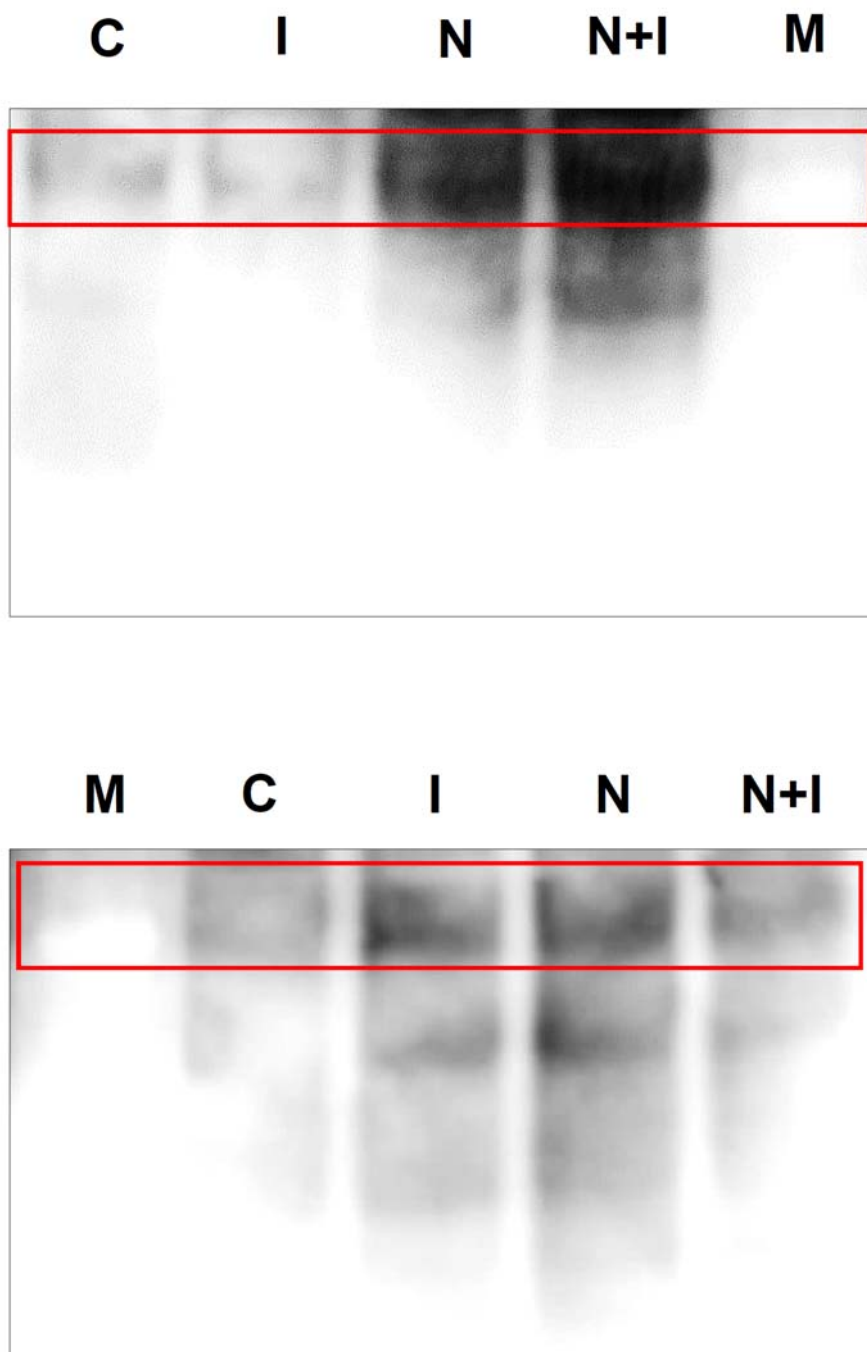

# SUPPLEMENTARY DATA

**Supplementary Figure 2.** Resazurin cell viability assay in primary adipocytes treated with 500  $\mu\text{M}$  nitrate, 100 nM insulin, or 500  $\mu\text{M}$  nitrate and 100 nM insulin ( $n \geq 22$ ). Data is displayed as Mean  $\pm$  SEM.

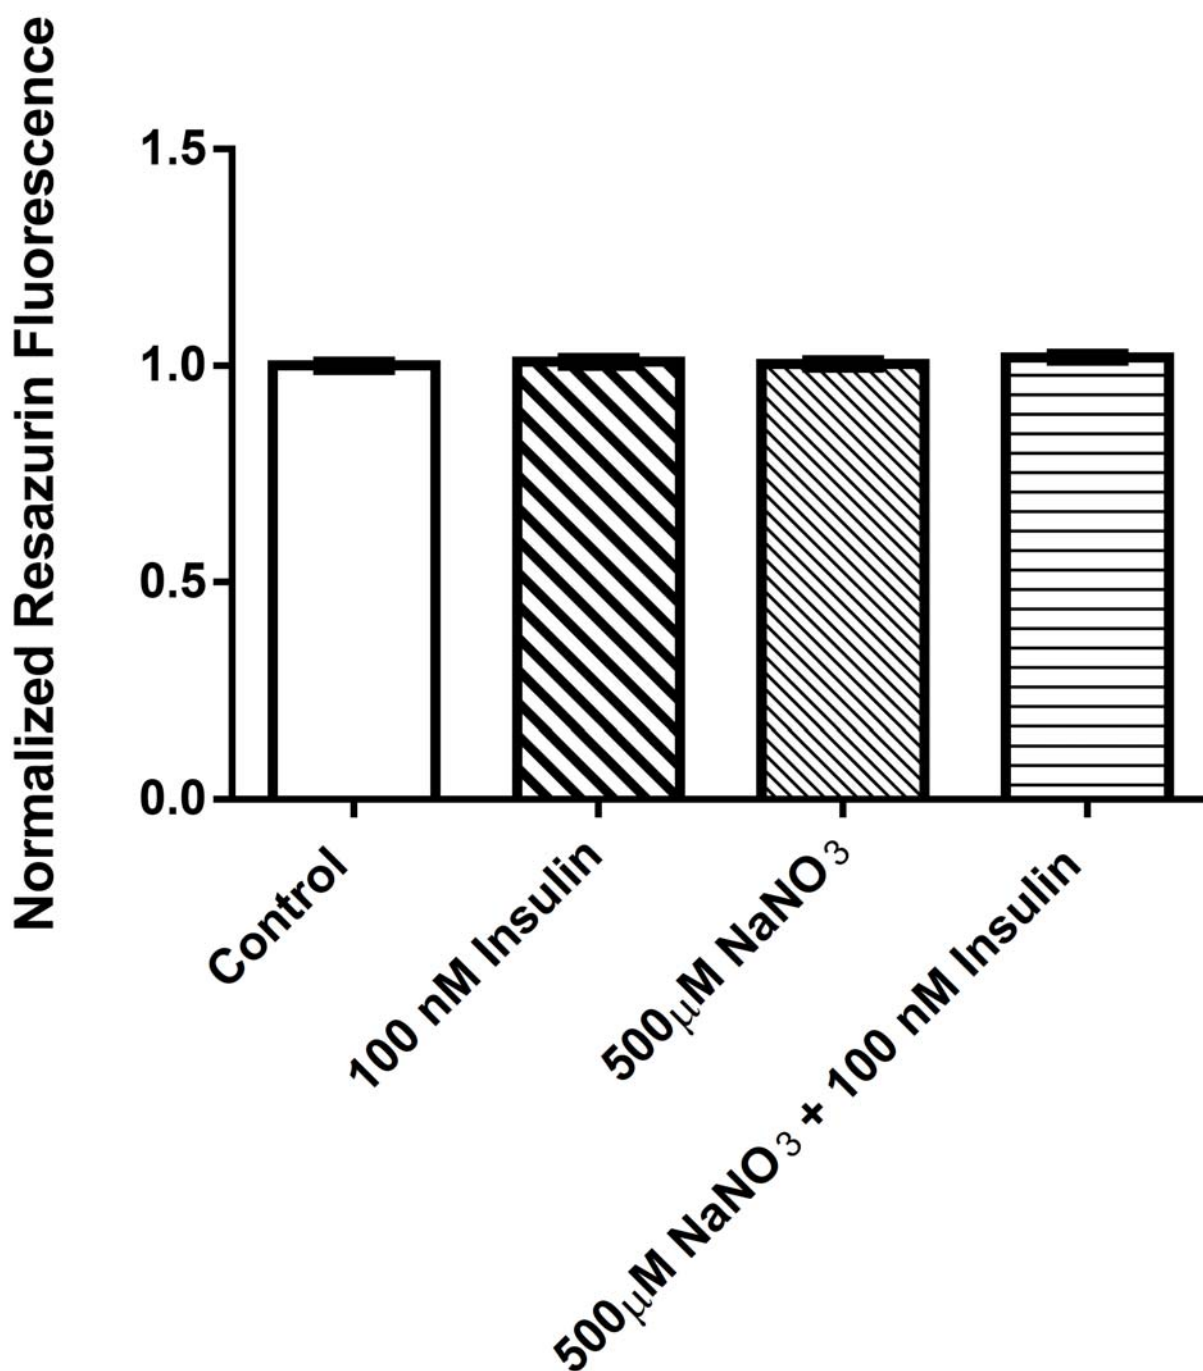

SUPPLEMENTARY DATA

**Supplementary Figure 3.** Resazurin cell viability assay in primary adipocytes treated with 500  $\mu\text{M}$  nitrate, 50  $\mu\text{M}$  PTIO, or 500  $\mu\text{M}$  nitrate and 50  $\mu\text{M}$  PTIO ( $n = 8$ ). Data is displayed as Mean  $\pm$  SEM.

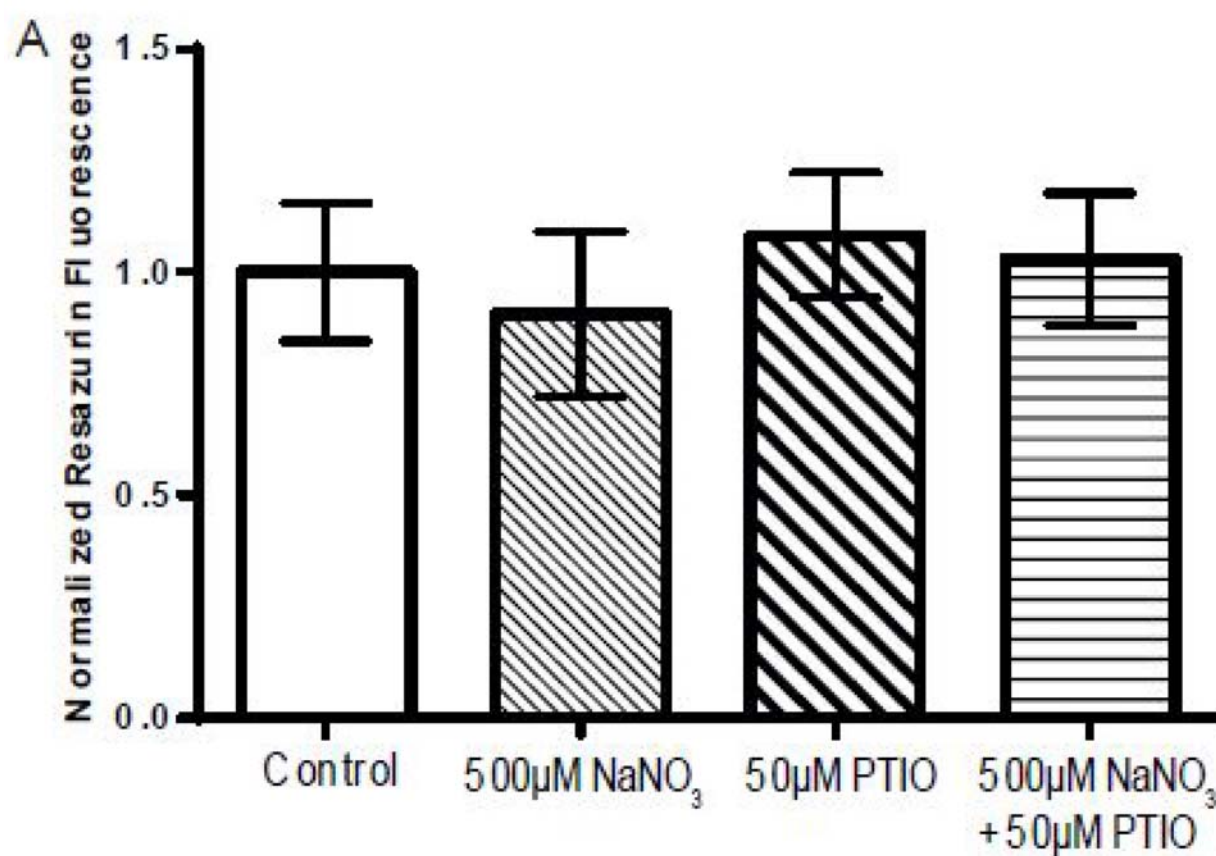

SUPPLEMENTARY DATA

**Supplementary Figure 4.** Xanthine Oxidoreductase (XOR) expression in primary adipocytes treated with scrambled control siRNA or siRNA against XOR with and without 500  $\mu$ M nitrate (n = 3). Data is displayed as Mean  $\pm$  SEM. \*\*\*,  $P \leq 0.001$ .

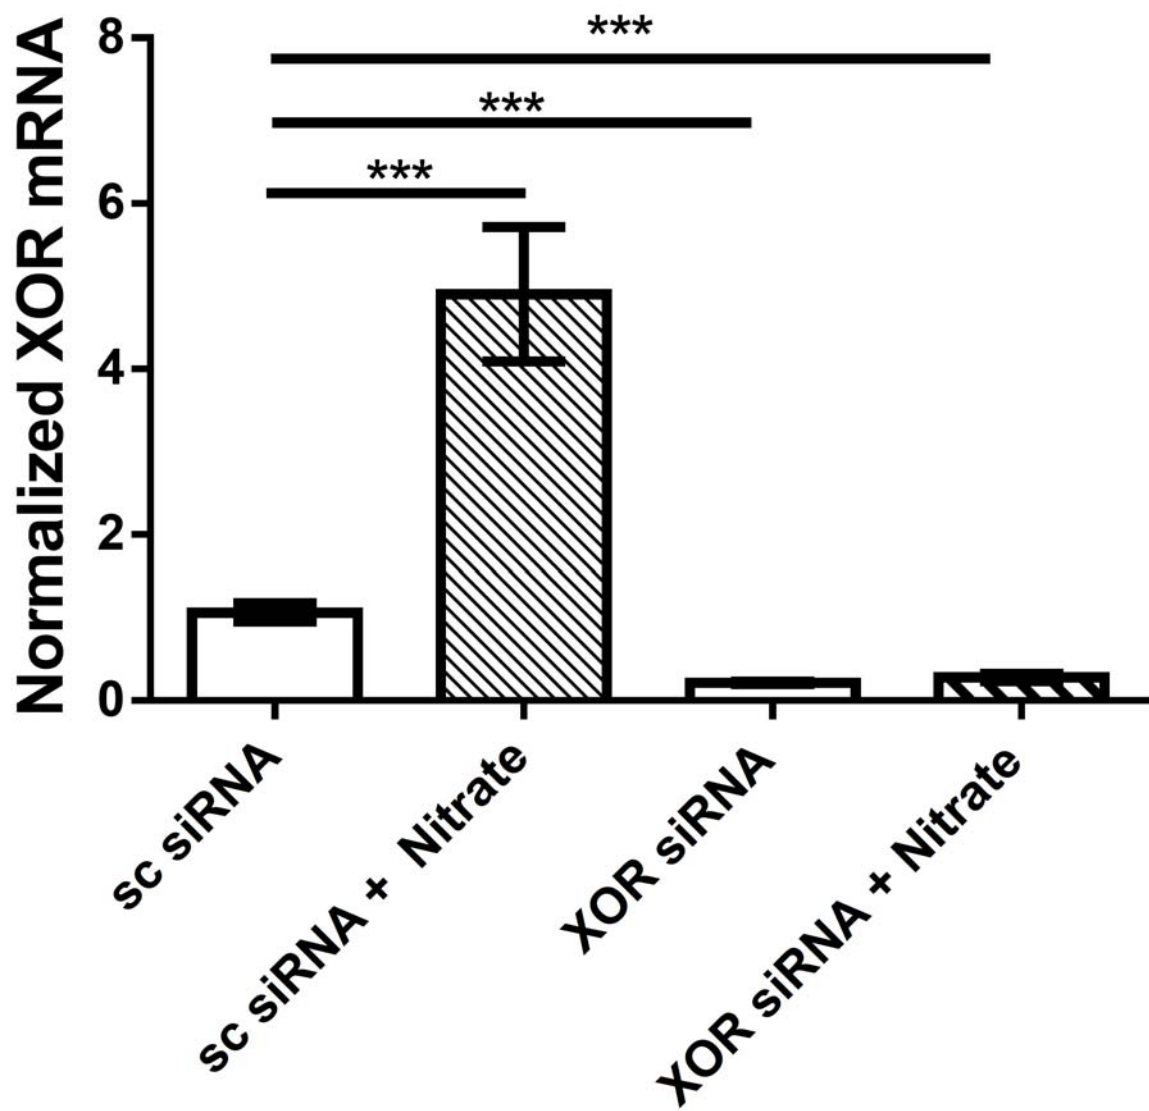

# SUPPLEMENTARY DATA

**Supplementary Figure 5.** Resazurin cell viability assay in primary adipocytes treated with negative control siRNA or siRNA against XOR with and without 500  $\mu\text{M}$   $\text{NaNO}_3$  ( $n = 6$ ). Data is displayed as Mean  $\pm$  SEM.

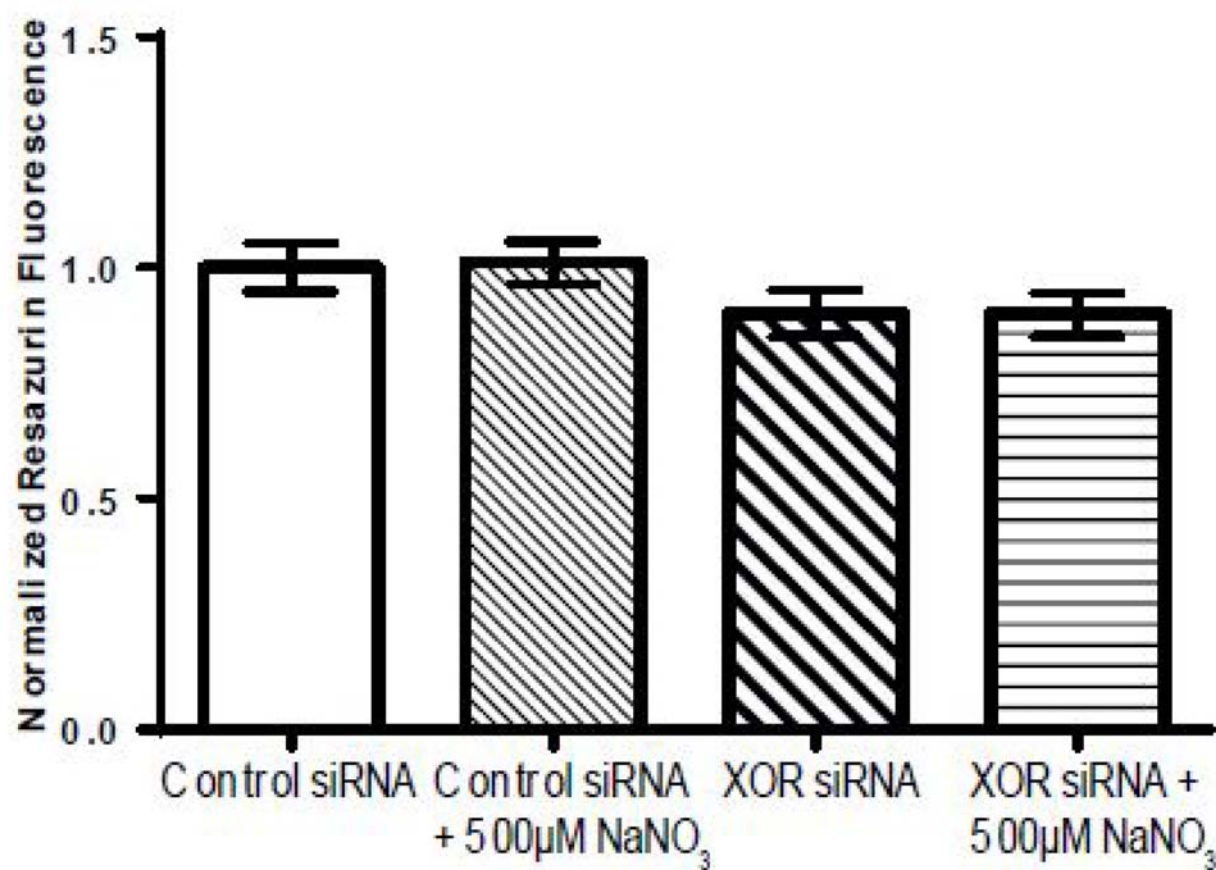

# SUPPLEMENTARY DATA

**Supplementary Table 1.** Table of morphological parameters of rats treated with 0.7 mM NaCl or 0.7 mM NaNO<sub>3</sub> in drinking water for 18 days. Table detailing start and final weights, food and water intakes, daily nitrate intake, and plasma insulin concentration. Data were analysed by Student's t-test and are Mean  $\pm$  SEM. \*\*\*  $P \leq 0.0001$ .

|                                                   | <b>0.7 mM<br/>NaCl<br/>(n = 6)</b> | <b>0.7 mM<br/>NaNO<sub>3</sub><br/>(n = 6)</b> |
|---------------------------------------------------|------------------------------------|------------------------------------------------|
| <b>Start weight (g)</b>                           | 265 $\pm$ 5                        | 270 $\pm$ 4                                    |
| <b>End weight (g)</b>                             | 406 $\pm$ 8                        | 415 $\pm$ 9                                    |
| <b>Food intake<br/>(g/day)</b>                    | 30 $\pm$ 1                         | 30 $\pm$ 1                                     |
| <b>Water intake<br/>(mL/day)</b>                  | 30 $\pm$ 3                         | 36 $\pm$ 3                                     |
| <b>Nitrate intake<br/>(mg/kg/day)</b>             | 1 $\pm$ 1                          | 8 $\pm$ 2 ***                                  |
| <b>Plasma Insulin<br/>(<math>\mu</math>g / L)</b> | 1.18 $\pm$ 0.2                     | 1.16 $\pm$ 0.3                                 |
